# Supplementary material for: Grewia spp. Biopolymer as Low-Cost Biosorbent for Hexavalent Chromium Removal
Source: Hindawi journal article supplement (doi:10.1155/2019/6505731), 2019-05-15
Supplement: f1 [file 6505731.f1.docx]

Effect of pH

| **pH** | **Q (mg/g)** |
| --- | --- |
| 2 | 10,31 |
| 4 | 11,91 |
| 6 | 11,25 |
| 8 | 9,48 |

Effect of biosorbent mass and percentage removal

| Masse | Q (mg/g) | % Removal |
| --- | --- | --- |
| 0,1000 | 47,0000 | 47,0000 |
| 0,2000 | 33,5000 | 67,0000 |
| 0,3000 | 25,7333 | 77,2000 |
| 0,4000 | 21,4750 | 85,9000 |
| 0,5000 | 18,0800 | 90,4000 |
| 0,6000 | 15,4167 | 92,5000 |
| 0,7000 | 13,6429 | 95,5000 |
| 0,8000 | 12,2625 | 98,1000 |
| 0,9000 | 10,9889 | 98,9000 |
| 1,0000 | 9,9900 | 99,9000 |
| 0,1000 | 47,0000 | 47,0000 |

Effect of contact time at different pH

| Time (min) | Q (mg/g) –pH 2 | Q (mg/g)-pH 8 | Q (mg/g)-pH 4 | Q (mg/g) pH6 |
| --- | --- | --- | --- | --- |
| 0 | 0,00 | 0,00 | 0,00 | 0,00 |
| 2 | 1,53 | 1,02 | 2,18 | 1,05 |
| 5 | 3,23 | 2,87 | 4,77 | 4,22 |
| 10 | 5,26 | 4,72 | 6,76 | 6,18 |
| 15 | 6,85 | 5,84 | 8,58 | 7,54 |
| 20 | 7,66 | 6,54 | 9,52 | 8,55 |
| 25 | 8,55 | 7,14 | 10,53 | 9,27 |
| 30 | 9,48 | 8,07 | 10,88 | 9,86 |
| 35 | 9,74 | 8,70 | 11,16 | 10,41 |
| 40 | 9,83 | 8,79 | 11,27 | 10,80 |
| 45 | 10,00 | 8,95 | 11,51 | 10,92 |
| 50 | 10,32 | 9,29 | 11,65 | 11,10 |
| 55 | 10,33 | 9,39 | 11,84 | 11,10 |
| 60 | 10,31 | 9,48 | 11,91 | 11,25 |
| 65 | 10,31 | 9,51 | 11,91 | 11,25 |
| 70 | 10,31 | 9,50 | 11,91 | 11,25 |
| 75 | 10,31 | 9,50 | 11,91 | 11,25 |

Effect of initial chromium concentration

| Cr (VI) concentration (mg/L) | Q (mg/g) |
| --- | --- |
| 20 | 1,77 |
| 40 | 3,91 |
| 60 | 6,13 |
| 80 | 8,57 |
| 100 | 11,30 |
